# Supplementary material for: Microbial ecology and biogeochemistry of hypersaline sediments in Orca Basin
Source: PubMed Central journal article supplement (PMC7173876; doi:10.1371/journal.pone.0231676), 2020-04-21
Supplement: pone.0231676.s002.pdf [file pone.0231676.s002.pdf]

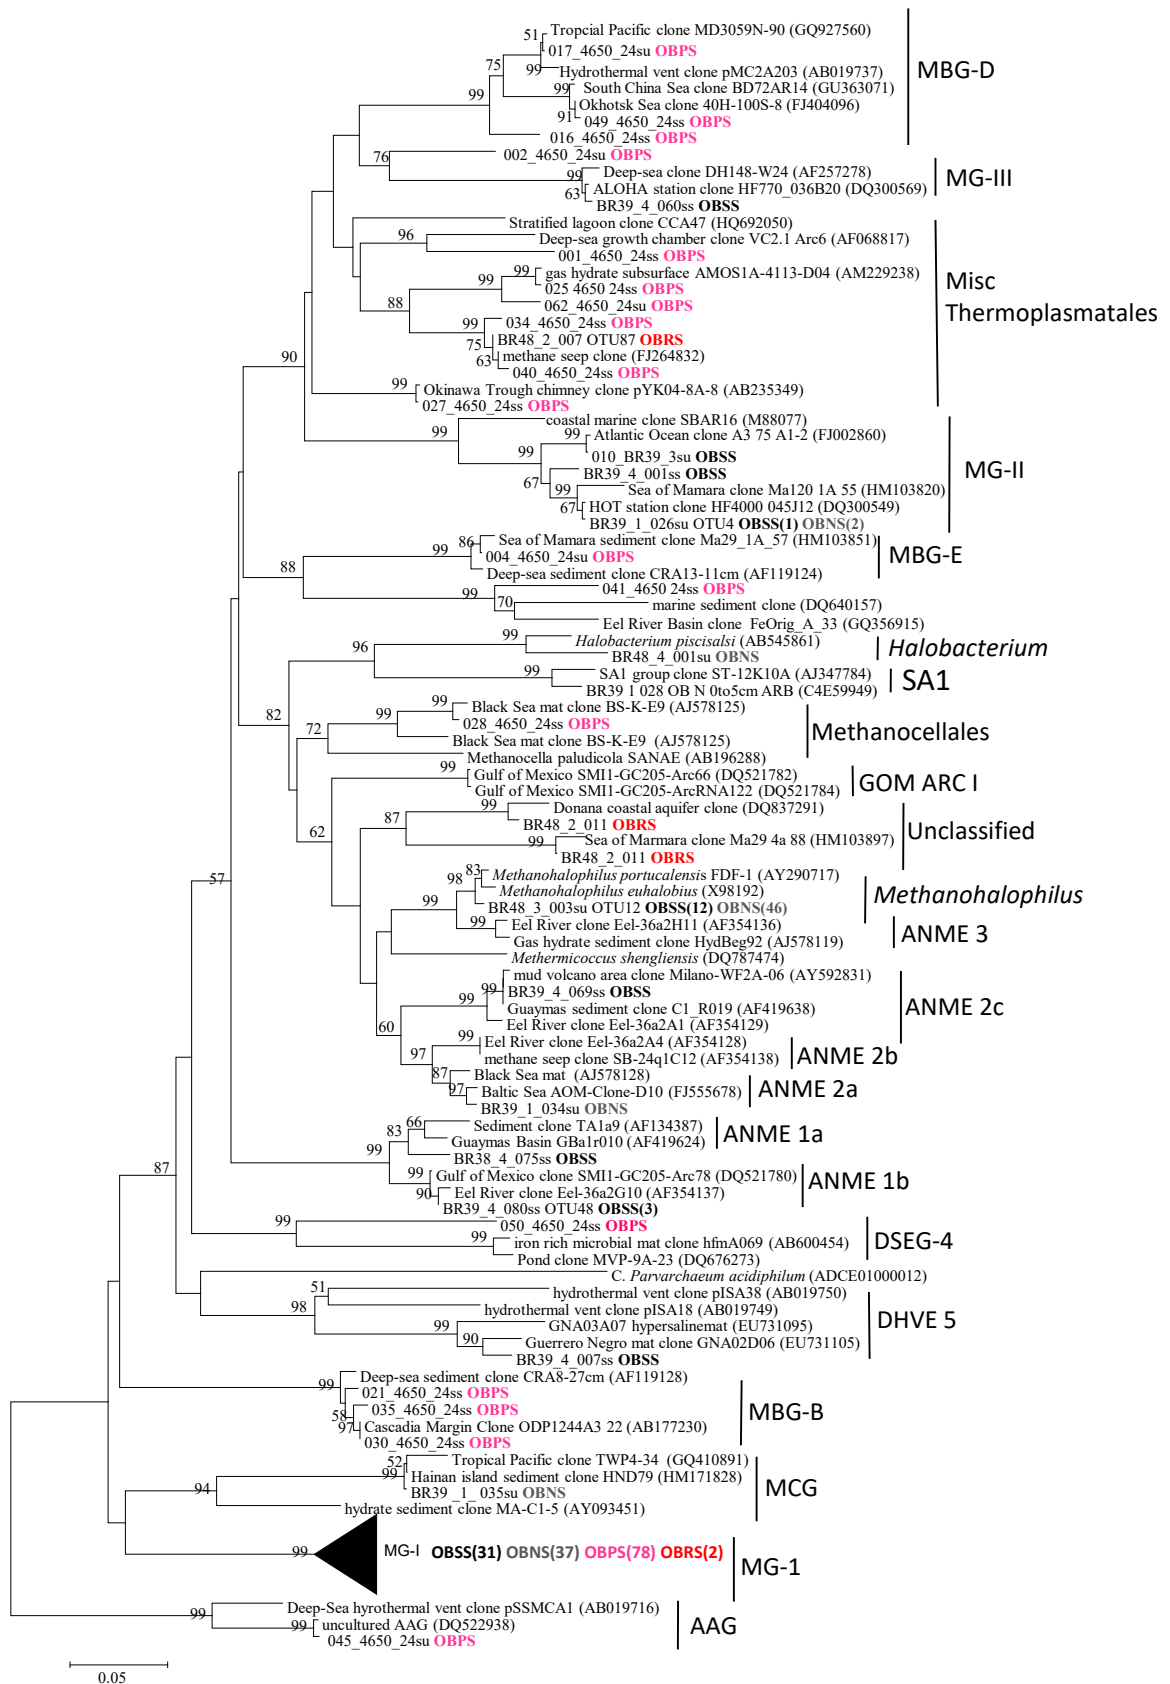

**S2 Fig: Phylogenetic tree of near-complete Orca Basin archaeal 16S rRNA gene clone sequences.** Tree was constructed with the NJ method. Bootstrap values are displayed next to nodes. Only bootstrap values of >50% shown. **OBSS:** Orca Basin south sub-basin hypersaline sediment (MUC 6), **OBNS:** Orca Basin north sub-basin hypersaline sediment (MUC 7), **OBRS:** Orca Basin saddle area red sediment (MUC 8), **OBPS:** Orca Basin saddle area pink sediment (core 4650-24). **OBSG:** Orca Basin saddle area sponge garden (core 4650-3) For sites with multiple sequences > 97%, number of clone sequences per OTU are indicated in parentheses.
