# Supplementary material for: Microbial ecology and biogeochemistry of hypersaline sediments in Orca Basin
Source: PLoS One. 2020 Apr 21;15(4):e0231676. doi: 10.1371/journal.pone.0231676 (PMC7173876; doi:10.1371/journal.pone.0231676)
Supplement: S1 Fig — (PDF) [file pone.0231676.s001.pdf]

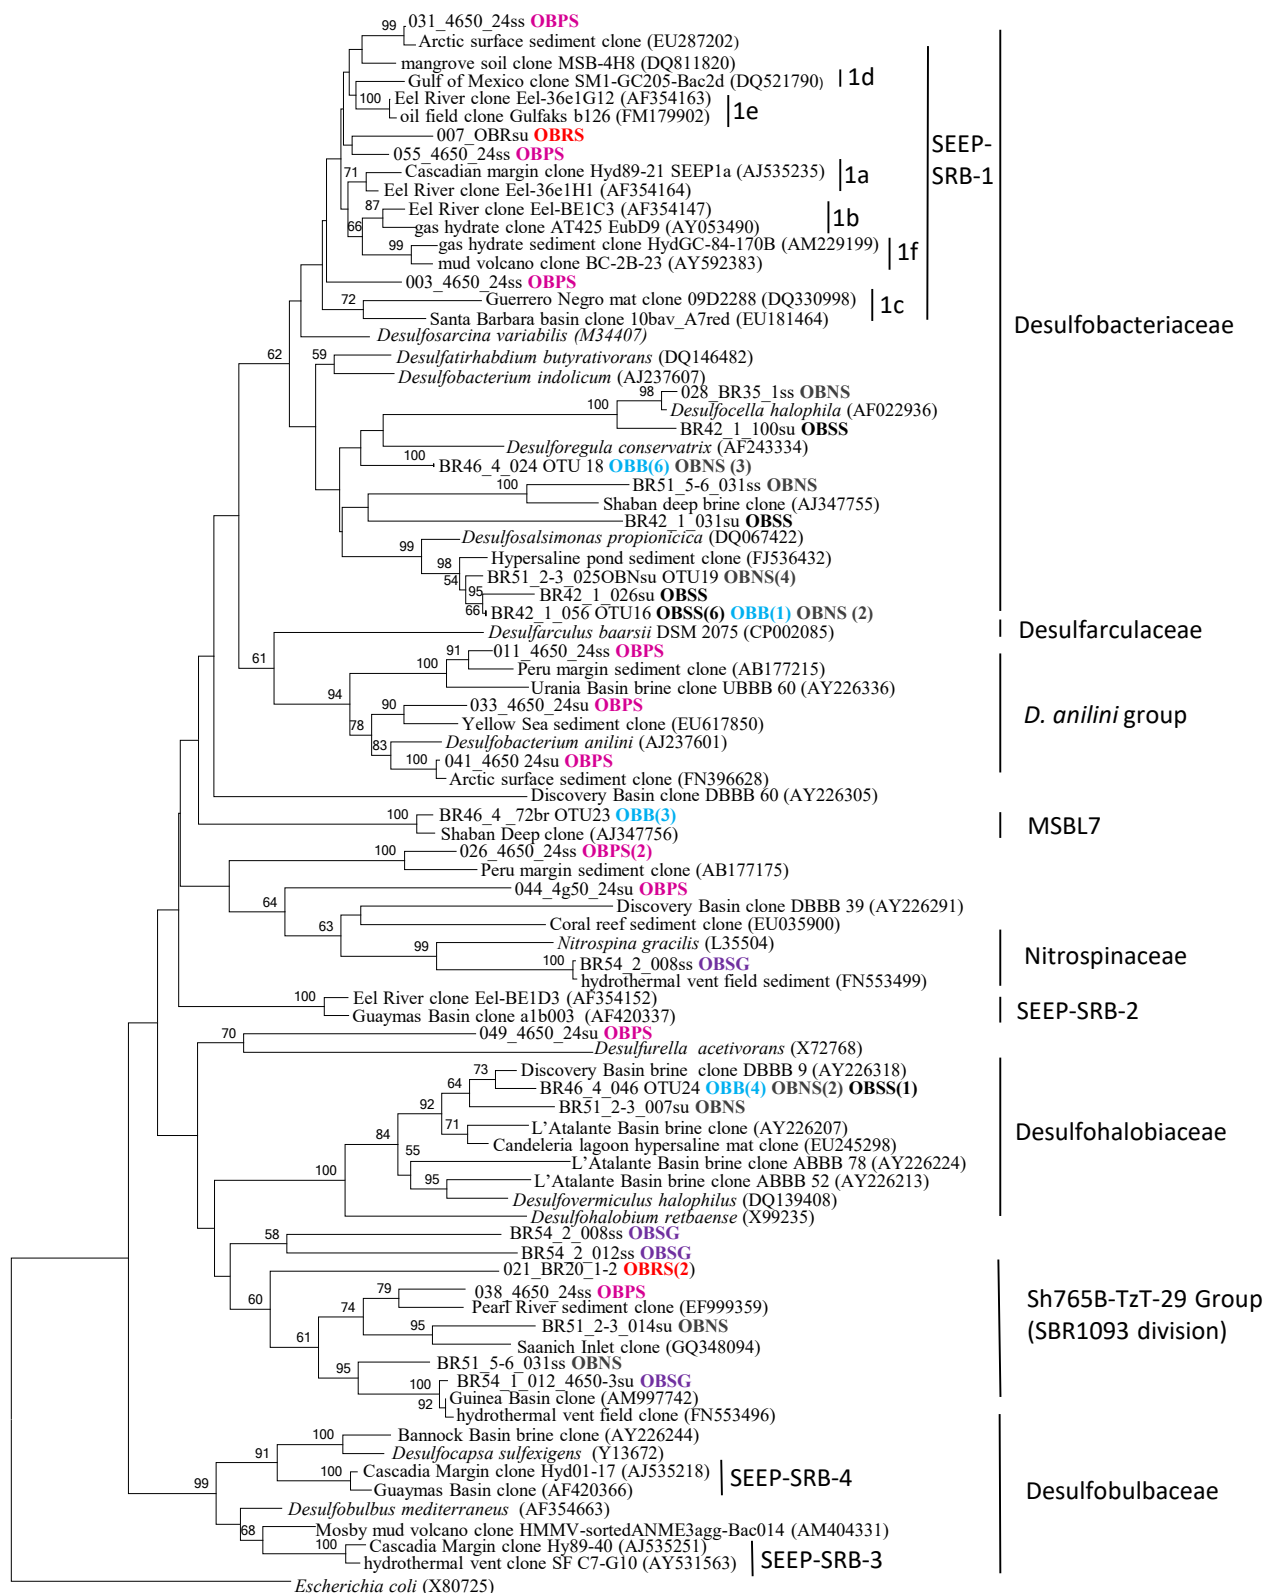

**S1 Fig: Phylogenetic tree of near-complete Orca Basin deltaproteobacterial 16S rRNA gene clone sequences.** Tree was constructed with the NJ method. Bootstrap values are displayed next to nodes. Only bootstrap values of >50% shown. **OBBS**: Orca basin south sub-basin brine. **OBNS**: Orca Basin north sub-basin hypersaline sediment (MUC 6), **OBPS**: Orca Basin saddle area red sediment (MUC 8), **OBBSG**: Orca Basin saddle area sponge garden (core 4650-3) For sites with multiple sequences > 97%, number of clone sequences per OTU are indicated in parentheses.
